# Supplementary material for: Dual Geometry Schemes in Tetrel Bonds: Complexes between TF4 (T = Si, Ge, Sn) and Pyridine Derivatives
Source: PubMed Central journal article supplement (PMC6359171; doi:10.3390/molecules24020376), 2019-01-21
Supplement: molecules-24-00376-s001.pdf [file molecules-24-00376-s001.pdf]

## Supplementary Information

# Dual Geometry Schemes in Tetrel Bonds: Complexes between $\text{TF}_4$ (T = Si, Ge, Sn) and Pyridine Derivatives

Wiktor Zierkiewicz <sup>1,\*</sup>, Mariusz Michalczyk <sup>1</sup>, Rafał Wysokiński <sup>1</sup> and Steve Scheiner <sup>2,\*</sup>

<sup>1</sup> Faculty of Chemistry, Wrocław University of Science and Technology, Wybrzeże Wyspiańskiego 27, 50-370 Wrocław, Poland; mariusz.michalczyk@pwr.edu.pl (M.M.); rafal.wysokinski@pwr.edu.pl (R.W.)

<sup>2</sup> Department of Chemistry and Biochemistry, Utah State University, Logan, 84322-0300 UT, USA

\* Correspondence: wiktor.zierkiewicz@pwr.edu.pl (W.Z.); steve.scheiner@usu.edu (S.S.)

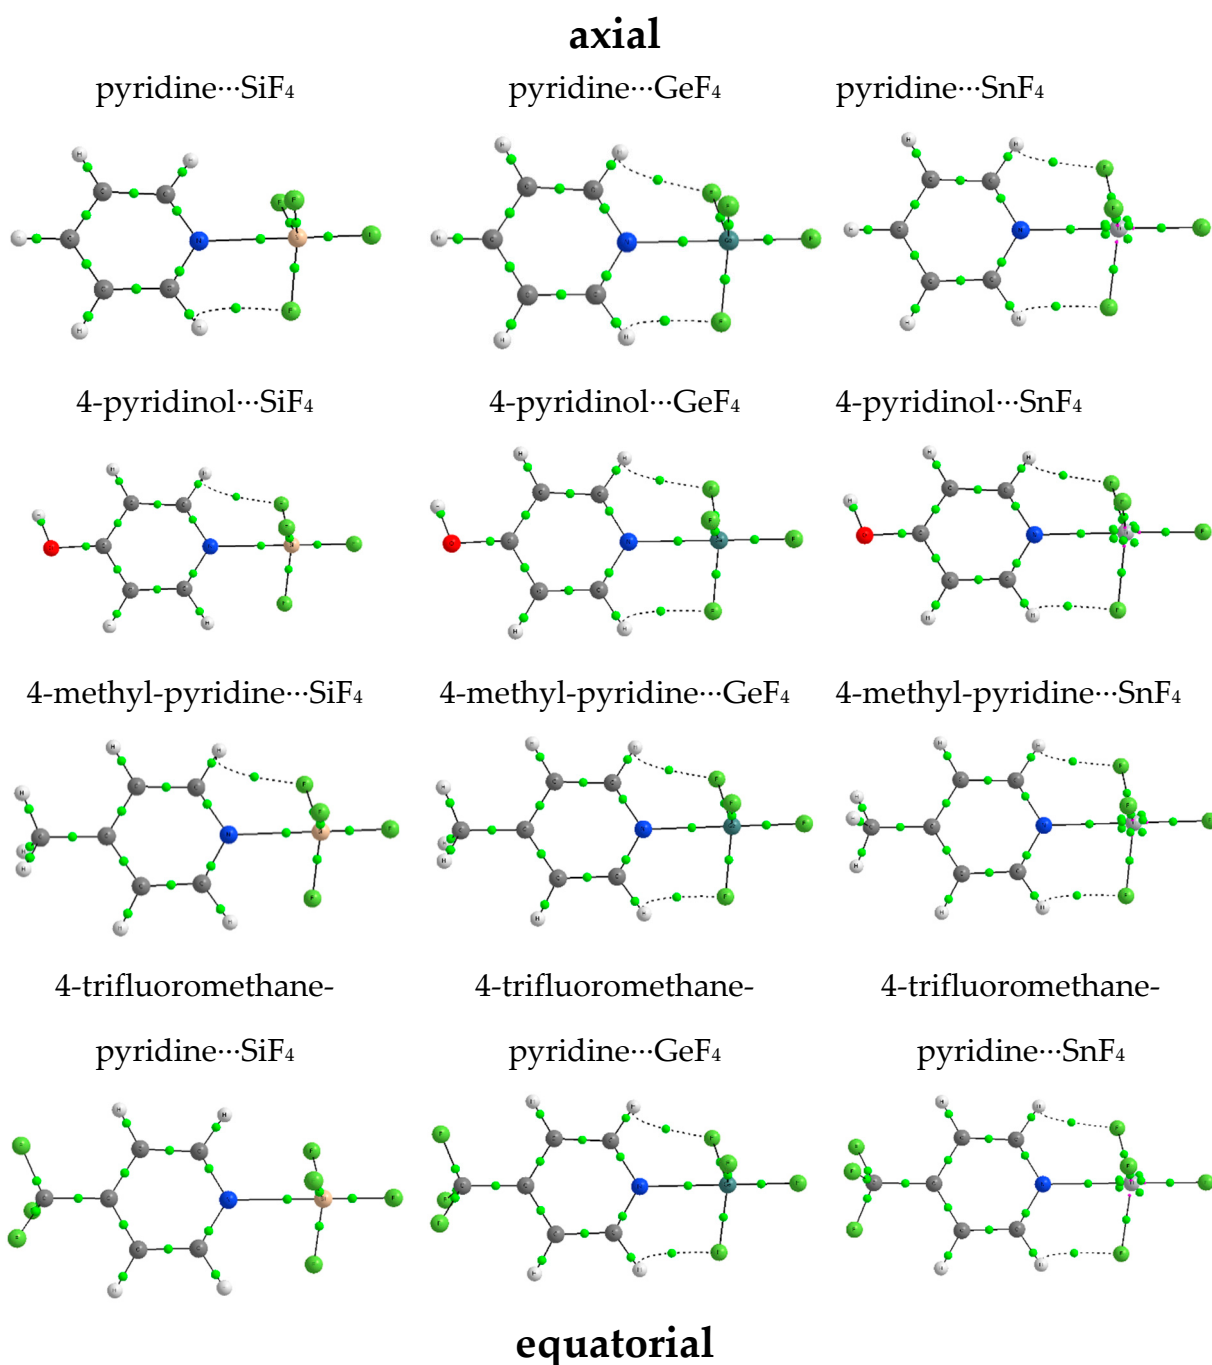

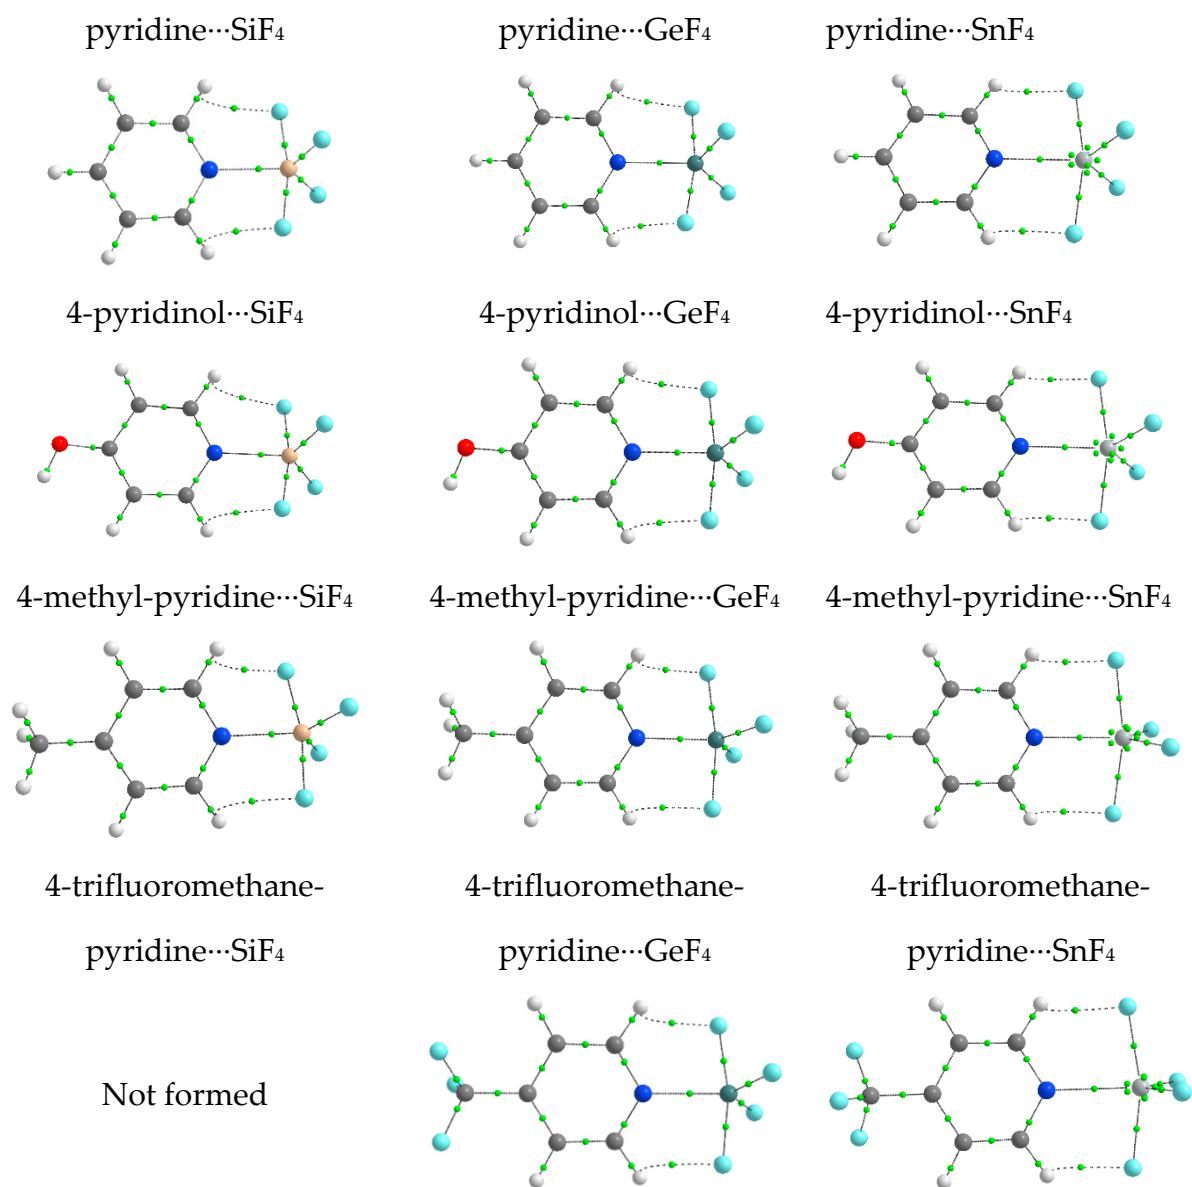

Fig. S1. AIM molecular graphs of axial and equatorial  $TF_4$  ( $T = \text{Si}, \text{Ge}, \text{Sn}$ ) complexes with pyridine derivatives at the MP2/cc-pVTZ level. Small green dots represent bond critical points.

Table S1. The delocalization index (DI) of  $T \cdots N$  interaction in  $TF_4$  complexes with pyridine and its derivatives. Data obtained at the MP2/cc-pVTZ level of theory.<sup>a</sup>

| Axial                 |       | Equatorial            |       |
|-----------------------|-------|-----------------------|-------|
| Complex               | DI    | Complex               | DI    |
| Py...SiF <sub>4</sub> | 0.101 | Py...SiF <sub>4</sub> | 0.170 |
| Py...GeF <sub>4</sub> | 0.248 | Py...GeF <sub>4</sub> | 0.336 |

|                            |       |                            |       |
|----------------------------|-------|----------------------------|-------|
| 4-HOPy...SiF <sub>4</sub>  | 0.106 | 4-HOPy...SiF <sub>4</sub>  | 0.174 |
| 4-HOPy...GeF <sub>4</sub>  | 0.256 | 4-HOPy...GeF <sub>4</sub>  | 0.344 |
| 4-MePy...SiF <sub>4</sub>  | 0.104 | 4-MePy...SiF <sub>4</sub>  | 0.173 |
| 4-MePy...GeF <sub>4</sub>  | 0.254 | 4-MePy...GeF <sub>4</sub>  | 0.340 |
| 4-TFMPy...SiF <sub>4</sub> | 0.088 | 4-TFMPy...SiF <sub>4</sub> | -     |
| 4-TFMPy...GeF <sub>4</sub> | 0.234 | 4-TFMPy...GeF <sub>4</sub> | 0.323 |

<sup>a</sup> values for Sn complexes are not available in AIM analysis due to the basis set used during investigation.

Table S2. Gibbs free energies of axial and equatorial conformers as well as TS for TF<sub>4</sub> (T: Si, Ge, Sn) complexes with Py, calculated at the MP2/cc-pVTZ level of theory.

|                       | axial | TS                       | equatorial |
|-----------------------|-------|--------------------------|------------|
| Py...SiF <sub>4</sub> | 0.00  | 11.79 (-19) <sup>a</sup> | 10.14      |
| Py...GeF <sub>4</sub> | 0.00  | 8.38 (-36)               | 6.79       |
| Py...SnF <sub>4</sub> | 0.00  | 1.46 (-18)               | 3.46       |

<sup>a</sup> imaginary frequency of TS is given in parenthesis.

Table S3. Secondary minima for TF<sub>4</sub> complexes with pyridine and its derivatives. Data obtained at the MP2/cc-pVTZ level of theory. E<sub>int</sub> corrected for BSSE (in kcal/mol). Parameters: distances in Å, angles in degrees.

| System                | E <sub>int</sub> | Parameters                                | Structure                                                                            |
|-----------------------|------------------|-------------------------------------------|--------------------------------------------------------------------------------------|
| Py...SiF <sub>4</sub> | -1.50            | R(Si...C3): 3.590<br>F1-Si...C3:<br>175.7 | 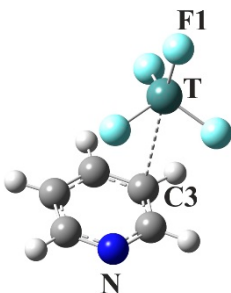 |
| Py...GeF <sub>4</sub> | -1.86            | R(Ge...C3): 3.452<br>F1-Ge...C3:<br>175.7 |                                                                                      |
| Py...SnF <sub>4</sub> | -5.47            | R(Sn...C3): 2.955<br>F1-Sn...C3:          |                                                                                      |

|                          |        |                                           |  |
|--------------------------|--------|-------------------------------------------|--|
|                          |        | 175.7                                     |  |
| Py...SiF <sub>4</sub>    | -1.46  | R(Si...C4): 3.599<br>F1-Si...C4:<br>175.1 |  |
| Py...GeF <sub>4</sub>    | -1.81  | R(Ge...C4): 3.356<br>F1-Ge...C4:<br>175.2 |  |
| Py...SnF <sub>4</sub>    | -4.85  | R(Sn...C4): 3.008<br>F1-Sn...C4:<br>175.1 |  |
| 4-HPy...SiF <sub>4</sub> | -2.58  | R(Si...O): 2.991<br>F1-Si...O: 177.8      |  |
| 4-HPy...GeF <sub>4</sub> | -6.36  | R(Ge...O): 2.531<br>F1-Ge...O:<br>176.6   |  |
| 4-HPy...SnF <sub>4</sub> | -17.02 | R(Sn...O): 2.303<br>F1-Sn...O: 173.8      |  |
| 4-HPy...SiF <sub>4</sub> | -1.88  | R(Si...C3): 3.488<br>F1-Si...C3:<br>173.3 |  |
| 4-HPy...GeF <sub>4</sub> | -2.49  | R(Ge...C3): 3.350<br>F1-Ge...C3:<br>174.0 |  |

|                          |        |                                           |  |
|--------------------------|--------|-------------------------------------------|--|
| 4-HPy...SnF <sub>4</sub> | -12.48 | R(Sn...C3): 2.664<br>F1-Sn...C3:<br>174.7 |  |
| 4-HPy...SiF <sub>4</sub> | -1.68  | R(Si...C4): 3.542<br>F1-Si...C4:<br>172.3 |  |
| 4-HPy...GeF <sub>4</sub> | -2.08  | R(Ge...C4): 3.474<br>F1-Ge...C4:<br>171.9 |  |
| 4-HPy...SnF <sub>4</sub> | -5.04  | R(Sn...C4): 3.190<br>F1-Sn...C4:<br>172.3 |  |
| 4-HPy...SiF <sub>4</sub> | -      | -                                         |  |
| 4-HPy...GeF <sub>4</sub> | -1.78  | R(Ge...C5): 3.461<br>F1-Ge...C5:<br>174.9 |  |
| 4-HPy...SnF <sub>4</sub> | -5.77  | R(Sn...C5): 2.958<br>F1-Sn...C5:<br>176.6 |  |
| 4-MPy...SiF <sub>4</sub> | -1.89  | R(Si...C4): 3.579<br>F1-Si...C4:<br>174.0 |  |
| 4-MPy...GeF <sub>4</sub> | -2.30  | R(Ge...C4): 3.507<br>F1-Ge...C4:<br>173.2 |  |
| 4-MPy...SnF <sub>4</sub> |        | R(Sn...C4):<br>F1-Sn...C4:                |  |

|                            |       |                                           |                                                                                     |
|----------------------------|-------|-------------------------------------------|-------------------------------------------------------------------------------------|
| 4-MPy...SiF <sub>4</sub>   | -1.88 | R(Si...C5): 3.591<br>F1-Si...C5:<br>174.6 | 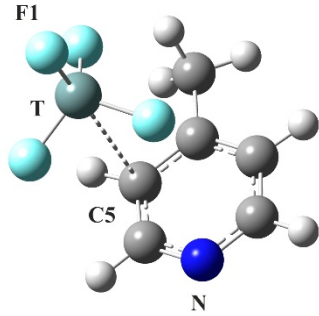  |
| 4-MPy...GeF <sub>4</sub>   | -2.30 | R(Ge...C5): 3.441<br>F1-Ge...C5:<br>175.3 |                                                                                     |
| 4-MPy...SnF <sub>4</sub>   | -7.14 | R(Sn...C5): 2.919<br>F1-Sn...C5:<br>176.3 |                                                                                     |
| 4-TFMPy...SiF <sub>4</sub> | -1.40 | R(Si...C5): 3.592<br>F1-Si...C5:<br>173.7 |  |
| 4-TFMPy...GeF <sub>4</sub> | -1.97 | R(Ge...C5): 3.520<br>F1-Ge...C5:<br>172.5 |                                                                                     |
| 4-TFMPy...SnF <sub>4</sub> | -2.52 | R(Sn...C5): 3.329<br>F1-Sn...C5:<br>172.6 |                                                                                     |

Table S4. Interaction energies ( $E_{\text{int}}$ , kcal mol<sup>-1</sup>) corrected for BSSE calculated at the MP2/cc-pVTZ (I), BLYP-D3/Def2TZVPP (II) and B2PLYP/def2TZVPP (III) levels of theory.

|                       | axial complexes |        |        | equatorial complexes |        |        |
|-----------------------|-----------------|--------|--------|----------------------|--------|--------|
|                       | (I)             | (II)   | (III)  | (I)                  | (II)   | (III)  |
| Py...SiF <sub>4</sub> | -26.75          | -22.50 | -25.72 | -50.09               | -47.38 | -50.79 |
| Py...GeF <sub>4</sub> | -34.73          | -34.37 | -35.53 | -52.02               | -48.71 | -52.99 |
| Py...SnF <sub>4</sub> | -39.68          | -37.87 | -39.61 | -50.66               | -44.97 | -49.92 |

Table S5. Molecular coordinates for minima of primary TF<sub>4</sub> complexes with pyridine and its derivatives. Data obtained at the MP2/cc-pVTZ level of theory.

| System                | axial |           |           | equatorial |    |           |           |           |
|-----------------------|-------|-----------|-----------|------------|----|-----------|-----------|-----------|
| Py...SiF <sub>4</sub> | F     | 1.583251  | 0.030612  | 1.581591   | N  | 0.478657  | 0.003751  | -0.001309 |
|                       | F     | 1.733921  | 1.364867  | -0.814763  | C  | 1.159679  | -1.148107 | 0.150653  |
|                       | F     | 3.498622  | -0.001105 | 0.102934   | C  | 2.545227  | -1.173893 | 0.172045  |
|                       | F     | 1.732174  | -1.397781 | -0.762173  | C  | 3.252948  | 0.009130  | -0.002627 |
|                       | C     | -0.937672 | -1.153323 | -0.067588  | C  | 2.540484  | 1.189400  | -0.176595 |
|                       | C     | -2.324130 | -1.186764 | -0.010080  | C  | 1.155059  | 1.158236  | -0.153877 |
|                       | C     | -2.314874 | 1.201157  | -0.010084  | H  | 0.560191  | -2.037892 | 0.243246  |
|                       | C     | -0.928870 | 1.156823  | -0.067700  | H  | 3.050773  | -2.116717 | 0.314990  |
|                       | N     | -0.249414 | -0.000918 | -0.098756  | H  | 3.042230  | 2.134185  | -0.319976 |
|                       | H     | -0.347562 | -2.055488 | -0.097683  | H  | 0.552045  | 2.045705  | -0.245774 |
|                       | H     | -2.831506 | -2.139621 | 0.009887   | Si | -1.494256 | -0.000661 | 0.000378  |
|                       | H     | -2.814850 | 2.157915  | 0.009915   | F  | -1.315694 | 1.470473  | 0.722991  |
|                       | H     | -0.332029 | 2.054646  | -0.098166  | F  | -1.310272 | -1.469667 | -0.725232 |
|                       | Si    | 1.890801  | -0.001351 | 0.009801   | F  | -2.267353 | -0.626411 | 1.261278  |
|                       | C     | -3.030559 | 0.009900  | 0.018751   | F  | -2.280857 | 0.619448  | -1.255073 |
|                       | H     | -4.110333 | 0.014085  | 0.062396   | H  | 4.333575  | 0.011223  | -0.003142 |
| Py...GeF <sub>4</sub> | F     | 1.561493  | 0.036062  | 1.699323   | N  | 0.504357  | 0.003763  | -0.001411 |
|                       | F     | 1.730588  | 1.470523  | -0.878121  | C  | 1.181000  | -1.155150 | 0.115007  |
|                       | F     | 3.577296  | -0.000222 | 0.107835   | C  | 2.566601  | -1.179762 | 0.130886  |
|                       | F     | 1.730190  | -1.508235 | -0.817141  | C  | 3.273374  | 0.009235  | -0.002702 |
|                       | C     | -0.940411 | -1.158256 | -0.068688  | C  | 2.561783  | 1.195428  | -0.135604 |
|                       | C     | -2.326211 | -1.187611 | -0.010134  | C  | 1.176301  | 1.165339  | -0.118424 |
|                       | C     | -2.316228 | 1.201995  | -0.008664  | H  | 0.577205  | -2.044418 | 0.181145  |

|                          |                                 |                                 |
|--------------------------|---------------------------------|---------------------------------|
|                          | C -0.930903 1.160929 -0.067388  | H 3.072871 -2.126713 0.239870   |
|                          | N -0.258530 -0.001491 -0.100621 | H 3.064204 2.144378 -0.245019   |
|                          | H -0.346476 -2.057332 -0.101370 | H 0.568936 2.052219 -0.183892   |
|                          | H -2.834531 -2.139791 0.009938  | Ge -1.519862 -0.000760 0.000512 |
|                          | H -2.816565 2.158365 0.012623   | F -1.355628 1.631132 0.631125   |
|                          | H -0.329929 2.055447 -0.099529  | F -1.349442 -1.630803 -0.633275 |
|                          | Ge 1.858550 -0.001373 0.005787  | F -2.329595 -0.552378 1.408138  |
|                          | C -3.030842 0.010079 0.019885   | F -2.343670 0.545321 -1.401169  |
|                          | H -4.110521 0.014563 0.064547   | H 4.353999 0.011371 -0.003208   |
|                          | F 1.632243 0.007719 1.900168    | N 0.568934 0.004530 -0.001195   |
|                          | F 1.755635 1.678662 -0.896749   | C 1.244386 -1.160434 -0.079562  |
|                          | F 3.843686 -0.007766 0.043847   | C 2.630681 -1.188931 -0.080701  |
|                          | F 1.746950 -1.693981 -0.878244  | C 3.340172 0.003301 0.000316    |
|                          | C -0.980802 -1.158875 -0.064695 | C 2.631637 1.196151 0.080551    |
|                          | C -2.366531 -1.188104 -0.009038 | C 1.245317 1.168869 0.077899    |
|                          | C -2.360076 1.204063 -0.021107  | H 0.634302 -2.047067 -0.139871  |
|                          | C -0.974528 1.166787 -0.076437  | H 3.135068 -2.141104 -0.144817  |
| Py...SnF <sub>4</sub>    | N -0.303472 0.001995 -0.097142  | H 3.136782 2.147885 0.145216    |
|                          | H -0.382520 -2.055898 -0.099119 | H 0.635930 2.056027 0.137550    |
|                          | H -2.874919 -2.140145 0.013062  | Sn -1.649221 0.005160 -0.002623 |
|                          | H -2.863308 2.159013 -0.008623  | F -1.423842 1.923829 0.128876   |
|                          | H -0.371433 2.060184 -0.119948  | F -1.424977 -1.913724 -0.132784 |
|                          | Sn 1.938245 -0.003205 0.011146  | F -2.564168 -0.108391 1.665273  |
|                          | C -3.071206 0.010038 0.014141   | F -2.559433 0.119270 -1.673068  |
|                          | H -4.150992 0.013163 0.057019   | H 4.420870 0.002830 0.000917    |
|                          | F 1.579004 -0.056234 1.586251   | N 0.173409 0.004115 -0.001711   |
| 4-HPy...SiF <sub>4</sub> | F 1.722027 1.417468 -0.734689   | C 0.864521 -1.148455 0.086046   |
|                          | F 3.482915 0.003977 0.099114    | C 2.244948 -1.180292 0.106036   |





|                          |                                 |                                  |
|--------------------------|---------------------------------|----------------------------------|
|                          | C -3.319913 -0.021039 0.010642  | F -1.657229 -1.653042 -0.594961  |
|                          | O -4.665212 -0.105124 0.058874  | F -2.623655 -0.521179 1.418840   |
|                          | H -5.037417 0.781826 0.128068   | F -2.634825 0.503450 -1.421395   |
|                          | F 1.102260 -0.089996 1.898910   | N 0.258935 0.005147 0.005395     |
|                          | F 1.191668 1.751880 -0.781977   | C 0.945113 -1.149054 -0.115828   |
|                          | F 3.293359 0.023758 0.023580    | C 2.326051 -1.180476 -0.110912   |
|                          | F 1.215159 -1.631136 -0.972786  | C 3.036133 0.011429 0.022885     |
|                          | Sn 1.386924 0.011248 0.008711   | C 2.320755 1.201199 0.147825     |
|                          | C -1.521137 -1.158795 -0.146788 | C 0.941977 1.163867 0.135400     |
|                          | C -2.899960 -1.207783 -0.094177 | H 0.345099 -2.039164 -0.216108   |
|                          | C -2.909475 1.1838400 0.050602  | H 2.832472 -2.130392 -0.211055   |
| 4-HPy...SnF <sub>4</sub> | C -1.528146 1.154061 -0.006799  | O 4.379007 0.083273 0.038838     |
|                          | N -0.842235 0.003131 -0.103800  | H 2.840652 2.140947 0.253088     |
|                          | H -0.923478 -2.052026 -0.239608 | H 0.336588 2.050987 0.228079     |
|                          | H -3.418941 -2.153147 -0.133872 | H 4.750521 -0.802189 -0.055081   |
|                          | H -3.418364 2.134926 0.124703   | Sn -1.944357 -0.002163 -0.007800 |
|                          | H -0.939360 2.057952 0.008906   | F -1.733013 1.912457 0.198634    |
|                          | C -3.616105 -0.016561 0.008238  | F -1.715911 -1.916003 -0.214498  |
|                          | O -4.960346 -0.095113 0.057458  | F -2.868720 -0.186973 1.649192   |
|                          | H -5.330511 0.792653 0.129261   | F -2.857495 0.171242 -1.672240   |
|                          | F 1.596191 -0.049713 1.586048   | N 0.153965 -0.000715 -0.002556   |
|                          | F 1.750016 1.407929 -0.744518   | C 0.838609 1.154507 -0.104617    |
|                          | F 3.505578 -0.005706 0.105168   | C 2.222416 1.179400 -0.127821    |
|                          | F 1.742787 -1.358318 -0.827835  | C 2.953388 -0.001452 -0.009023   |
| 4-MPy...SiF <sub>4</sub> | Si 1.896290 0.000359 0.012056   | C 2.222445 -1.182092 0.110282    |
|                          | C -0.912769 -1.147049 -0.058468 | C 0.838404 -1.156354 0.094303    |
|                          | C -2.297466 -1.186050 -0.000799 | H 0.242546 2.049679 -0.159514    |
|                          | C -2.305702 1.186625 -0.016569  | H 2.723550 2.131122 -0.233555    |



|                            |                                 |                                 |
|----------------------------|---------------------------------|---------------------------------|
|                            | H -5.209477 0.829549 0.594560   | H 5.179169 0.845201 -0.546645   |
|                            | H -5.218599 0.024341 -0.970160  | H 5.137479 0.074623 1.034939    |
| 4-MPy...SnF <sub>4</sub>   | F 1.099674 -0.092257 1.897898   | N 0.825201 0.001440 -0.002223   |
|                            | F 1.218760 1.744258 -0.794690   | C 1.507559 -1.149636 -0.169876  |
|                            | F 3.308872 0.015206 0.046342    | C 2.892037 -1.168451 -0.195977  |
|                            | F 1.230695 -1.629130 -0.975337  | C 3.620376 0.011031 -0.047664   |
|                            | Sn 1.402741 0.010238 0.010511   | C 2.889129 1.185873 0.121601    |
|                            | C -1.506883 -1.152652 -0.145581 | C 1.504700 1.157445 0.141336    |
|                            | C -2.891216 -1.189014 -0.097187 | H 0.903845 -2.035700 -0.282031  |
|                            | C -2.899236 1.184518 0.031365   | H 3.395594 -2.114355 -0.337233  |
|                            | C -1.514717 1.162923 -0.020186  | H 3.390325 2.136626 0.236180    |
|                            | N -0.831371 0.008690 -0.106216  | H 0.898816 2.040093 0.267796    |
|                            | H -0.908090 -2.045807 -0.233463 | Sn -1.384549 -0.005989 0.032648 |
|                            | H -3.391721 -2.146210 -0.138817 | F -1.168342 1.902142 0.286519   |
|                            | H -3.406198 2.137214 0.093183   | F -1.163556 -1.912547 -0.228788 |
|                            | H -0.922027 2.064386 -0.010957  | F -2.271339 -0.233014 1.704945  |
|                            | C -3.623879 -0.006295 -0.003742 | F -2.328438 0.214612 -1.608954  |
|                            | C -5.119295 -0.015941 0.081392  | C 5.117534 0.012186 -0.042771   |
|                            | H -5.434209 -0.072979 1.123838  | H 5.487077 -0.125155 0.974022   |
|                            | H -5.542191 0.891040 -0.344498  | H 5.512287 -0.797489 -0.652080  |
|                            | H -5.536210 -0.874927 -0.439335 | H 5.510182 0.955737 -0.414519   |
| 4-TFMPy...SiF <sub>4</sub> | F 2.538870 0.042463 1.574390    |                                 |
|                            | F 2.678089 1.356864 -0.819472   |                                 |
|                            | F 4.468055 0.003717 0.095524    |                                 |
|                            | F 2.678848 -1.395762 -0.747916  |                                 |
|                            | Si 2.864569 0.001253 0.010075   |                                 |
|                            | C -0.005884 -1.155168 -0.042720 |                                 |

|                            |    |           |           |           |    |           |           |           |
|----------------------------|----|-----------|-----------|-----------|----|-----------|-----------|-----------|
|                            | C  | -1.391526 | -1.196340 | 0.016468  |    |           |           |           |
|                            | C  | -1.389908 | 1.199076  | -0.029632 |    |           |           |           |
|                            | C  | -0.004398 | 1.153793  | -0.087181 |    |           |           |           |
|                            | N  | 0.678150  | -0.001763 | -0.096301 |    |           |           |           |
|                            | H  | 0.585893  | -2.056919 | -0.054150 |    |           |           |           |
|                            | H  | -1.903903 | -2.145134 | 0.062284  |    |           |           |           |
|                            | H  | -1.901060 | 2.149595  | -0.020347 |    |           |           |           |
|                            | H  | 0.588484  | 2.053747  | -0.133357 |    |           |           |           |
|                            | C  | -2.094096 | 0.002428  | 0.025451  |    |           |           |           |
|                            | C  | -3.597297 | 0.003858  | 0.040967  |    |           |           |           |
|                            | F  | -4.079550 | 1.096778  | 0.641697  |    |           |           |           |
|                            | F  | -4.083793 | -0.018099 | -1.207695 |    |           |           |           |
|                            | F  | -4.081350 | -1.065936 | 0.680570  |    |           |           |           |
|                            |    |           |           |           |    |           |           |           |
| 4-TFMPy...GeF <sub>4</sub> | F  | 2.176379  | -0.053959 | 1.699925  | N  | -0.391666 | 0.002888  | -0.009392 |
|                            | F  | 2.348644  | 1.535828  | -0.776824 | C  | 0.281176  | 1.167293  | -0.081099 |
|                            | F  | 4.211231  | 0.014772  | 0.119543  | C  | 1.665901  | 1.199224  | -0.106337 |
|                            | F  | 2.354308  | -1.435259 | -0.898260 | C  | 2.369296  | 0.003691  | -0.031763 |
|                            | Ge | 2.495844  | 0.015766  | 0.013677  | C  | 1.668015  | -1.191955 | 0.057820  |
|                            | C  | -0.317914 | -1.144759 | -0.116256 | C  | 0.282967  | -1.160985 | 0.052113  |
|                            | C  | -1.702803 | -1.188662 | -0.062687 | H  | -0.323872 | 2.057835  | -0.106621 |
|                            | C  | -1.707425 | 1.206399  | 0.034906  | H  | 2.177088  | 2.146336  | -0.184536 |
|                            | C  | -0.322381 | 1.172333  | -0.021840 | H  | 2.180798  | -2.139675 | 0.115128  |
|                            | N  | 0.356533  | 0.016356  | -0.100045 | H  | -0.320951 | -2.052142 | 0.082516  |
|                            | H  | 0.280439  | -2.039173 | -0.181826 | Ge | -2.430692 | 0.001258  | 0.005032  |
|                            | H  | -2.213238 | -2.139438 | -0.074588 | F  | -2.247549 | -1.595775 | -0.699967 |
|                            | H  | -2.221522 | 2.153017  | 0.100319  | F  | -2.239606 | 1.600935  | 0.701773  |
|                            | H  | 0.272512  | 2.071413  | -0.014330 | F  | -3.266539 | 0.607259  | -1.362238 |
|                            | C  | -2.407420 | 0.006289  | 0.016230  | F  | -3.228856 | -0.609744 | 1.392279  |

|                            |    |           |           |           |    |           |           |           |
|----------------------------|----|-----------|-----------|-----------|----|-----------|-----------|-----------|
|                            | C  | -3.911695 | 0.002825  | 0.028991  | C  | 3.874814  | 0.008037  | 0.001300  |
|                            | F  | -4.396227 | 1.057602  | 0.691417  | F  | 4.371837  | 1.042357  | -0.682255 |
|                            | F  | -4.393260 | 0.052294  | -1.220056 | F  | 4.313843  | 0.103177  | 1.262150  |
|                            | F  | -4.391967 | -1.103818 | 0.604162  | F  | 4.375162  | -1.114870 | -0.520753 |
| 4-TFMPy...SnF <sub>4</sub> | F  | 1.906487  | -0.056677 | 1.890815  | N  | 0.003335  | 0.003270  | -0.008028 |
|                            | F  | 2.057415  | 1.723588  | -0.827337 | C  | -0.671115 | 1.170817  | 0.015773  |
|                            | F  | 4.159145  | 0.012171  | 0.068799  | C  | -2.056548 | 1.204193  | -0.007720 |
|                            | F  | 2.065316  | -1.640019 | -0.947568 | C  | -2.759526 | 0.007188  | -0.059757 |
|                            | Sn | 2.256343  | 0.010105  | 0.012170  | C  | -2.058557 | -1.191917 | -0.081908 |
|                            | C  | -0.671038 | -1.153958 | -0.151718 | C  | -0.673067 | -1.162375 | -0.056554 |
|                            | C  | -2.056550 | -1.194823 | -0.117132 | H  | -0.061540 | 2.059147  | 0.052319  |
|                            | C  | -2.061057 | 1.202543  | -0.024633 | H  | -2.568103 | 2.154324  | 0.005656  |
|                            | C  | -0.675473 | 1.169732  | -0.062051 | H  | -2.571697 | -2.140203 | -0.127280 |
|                            | N  | 0.000875  | 0.009780  | -0.123356 | H  | -0.064982 | -2.052279 | -0.075350 |
|                            | H  | -0.069237 | -2.046724 | -0.218687 | Sn | 2.235885  | 0.000273  | 0.027984  |
|                            | H  | -2.568746 | -2.144119 | -0.150223 | F  | 1.986713  | -1.917422 | -0.035540 |
|                            | H  | -2.576849 | 2.149647  | 0.015424  | F  | 1.989906  | 1.918521  | 0.087158  |
|                            | H  | -0.077184 | 2.067360  | -0.060049 | F  | 3.122898  | -0.054376 | 1.711848  |
|                            | C  | -2.760155 | 0.001868  | -0.054540 | F  | 3.167445  | 0.052634  | -1.631754 |
|                            | C  | -4.263027 | -0.003503 | 0.028692  | C  | -4.265503 | 0.007897  | -0.041790 |
|                            | F  | -4.784697 | 1.095712  | -0.523722 | F  | -4.716733 | -0.030833 | 1.217782  |
|                            | F  | -4.662024 | -0.045318 | 1.306020  | F  | -4.758914 | -1.053855 | -0.684365 |
|                            | F  | -4.781266 | -1.066318 | -0.593592 | F  | -4.757117 | 1.108265  | -0.617270 |
